# Supplementary material for: Chronic Training Induces Metabolic and Proteomic Response in Male and Female Basketball Players: Salivary Modifications during In-Season Training Programs
Source: MDPI journal article supplement (doi:10.3390/healthcare11020241), 2023-01-12
Supplement: s1 [file s1]

**Supplementary Table S1.** Quantitative data and statistical analyses of protein spots whose intensity levels significantly differed among saliva of the four groups.

| Spots | Normalized volume (arbitrary unit) <sup>a</sup> Mean (SD) |              |               |                | ANOVA <i>p</i> -value <sup>b</sup> | Tukey's test/Fold Change <sup>d</sup> |                 |                 |                 |
|-------|-----------------------------------------------------------|--------------|---------------|----------------|------------------------------------|---------------------------------------|-----------------|-----------------|-----------------|
|       | Basket Male                                               | Control Male | Basket Female | Control Female |                                    | BM <i>vs</i> CM                       | BF <i>vs</i> CF | BM <i>vs</i> BF | CM <i>vs</i> CF |
| 1     | 58.8 ± 24.3                                               | 51.6 ± 17.4  | 27.4 ± 8.8    | 72.3 ± 19.9    | 0.036                              | ns                                    | *               | ns              | ns              |
| 2     | 35.1 ± 16.6                                               | 31.8 ± 3.7   | 22.7 ± 10.8   | 59.9 ± 13.5    | 0.037                              | ns                                    | *               | ns              | ns              |
| 3     | 7.5 ± 2.3                                                 | 21.9 ± 4.5   | 14 ± 7.4      | 36.6 ± 5.2     | 0.001                              | *                                     | **              | ns              | *               |
| 4     | 8.4 ± 2.1                                                 | 17 ± 6.4     | 9 ± 4.7       | 30 ± 6.3       | 0.006                              | ns                                    | **              | ns              | ns              |
| 5     | 39.9 ± 1.6                                                | 27.6 ± 1.1   | 21.1 ± 3.8    | 31.6 ± 2.3     | 0.0003                             | **                                    | **              | ****            | ns              |
| 6     | 10 ± 4.2                                                  | 12.8 ± 3.5   | 8.9 ± 3.1     | 21.1 ± 4.5     | 0.040                              | ns                                    | *               | ns              | ns              |
| 7     | 9.6 ± 3.2                                                 | 18.6 ± 7.1   | 6.9 ± 1.9     | 23.5 ± 9.5     | 0.009                              | ns                                    | *               | ns              | ns              |
| 8     | 5.1 ± 1.8                                                 | 3.3 ± 0.7    | 2 ± 0.6       | 6.9 ± 3.1      | 0.026                              | ns                                    | *               | ns              | ns              |
| 9     | 2.9 ± 0.9                                                 | 6.3 ± 1.7    | 2.8 ± 2.5     | 9.1 ± 3.4      | 0.049                              | ns                                    | *               | ns              | ns              |
| 10    | 3.1 ± 1.1                                                 | 7.1 ± 1.2    | 4.4 ± 2.3     | 8.8 ± 2.1      | 0.018                              | *                                     | ns              | ns              | ns              |
| 11    | 2.4 ± 1                                                   | 1.5 ± 0.4    | 1 ± 0.3       | 3.8 ± 1.1      | 0.007                              | ns                                    | **              | ns              | *               |
| 12    | 1.5 ± 0.6                                                 | 1.6 ± 1      | 0.4 ± 0.1     | 2.4 ± 1        | 0.009                              | ns                                    | *               | ns              | ns              |
| 13    | 2.2 ± 0.9                                                 | 4.1 ± 0.9    | 4.7 ± 1.1     | 3.1 ± 1.1      | 0.061                              | ns                                    | ns              | *               | ns              |
| 14    | 3.3 ± 2                                                   | 6.8 ± 0.5    | 3.2 ± 1.5     | 9 ± 0.9        | 0.020                              | *                                     | **              | ns              | ns              |
| 15    | 3.7 ± 2.2                                                 | 6.4 ± 1.7    | 2.9 ± 1.4     | 7.9 ± 1.9      | 0.033                              | ns                                    | *               | ns              | ns              |
| 16    | 1.8 ± 0.2                                                 | 1.5 ± 1.1    | 1 ± 0.2       | 3.1 ± 0.7      | 0.023                              | ns                                    | *               | ns              | ns              |
| 17    | 1.8 ± 0.5                                                 | 2.6 ± 0.7    | 3.9 ± 0.6     | 3.4 ± 0.9      | 0.023                              | ns                                    | ns              | *               | ns              |
| 18    | 0.4 ± 0.1                                                 | 0.4 ± 0.1    | 0.2 ± 0.1     | 1.2 ± 0.7      | 0.003                              | ns                                    | *               | ns              | ns              |
| 19    | 9.2 ± 3.2                                                 | 13.1 ± 4.9   | 14.5 ± 5      | 28.9 ± 1.9     | 0.016                              | ns                                    | **              | ns              | **              |
| 20    | 0.4 ± 0.2                                                 | 0.4 ± 0.1    | 0.3 ± 0.02    | 0.9 ± 0.2      | 0.005                              | ns                                    | **              | ns              | *               |
| 21    | 4.9 ± 1.1                                                 | 9.5 ± 1.8    | 7.6 ± 2.9     | 5.4 ± 0.6      | 0.035                              | *                                     | ns              | ns              | ns              |
| 22    | 11.7 ± 1.2                                                | 13 ± 2       | 9.4 ± 0.9     | 14 ± 2         | 0.031                              | ns                                    | *               | ns              | ns              |
| 23    | 2.3 ± 1.1                                                 | 2.3 ± 0.6    | 1.5 ± 0.8     | 4.2 ± 0.9      | 0.044                              | ns                                    | *               | ns              | ns              |
| 24    | 0.7 ± 0.2                                                 | 0.6 ± 0.2    | 1.9 ± 1       | 0.5 ± 0.2      | 0.038                              | ns                                    | *               | ns              | ns              |
| 25    | 10.7 ± 5.1                                                | 4 ± 1.7      | 2.4 ± 0.3     | 6.3 ± 1.5      | 0.014                              | ns                                    | ns              | *               | ns              |
| 26    | 7.1 ± 1.9                                                 | 3.7 ± 0.9    | 3.6 ± 0.1     | 2.2 ± 1.3      | 0.025                              | *                                     | ns              | *               | ns              |
| 27    | 2.7 ± 1.3                                                 | 4.3 ± 1.1    | 1.3 ± 0.8     | 4.5 ± 1.1      | 0.024                              | ns                                    | *               | ns              | ns              |
| 28    | 19.4 ± 7                                                  | 24 ± 9.6     | 7.8 ± 1.1     | 14.1 ± 6.7     | 0.029                              | ns                                    | ns              | *               | ns              |
| 29    | 0.6 ± 0.1                                                 | 0.2 ± 0.03   | 0.5 ± 0.2     | 0.4 ± 0.1      | 0.007                              | *                                     | ns              | ns              | ns              |
| 30    | 10.2 ± 2.5                                                | 12.7 ± 2     | 6.4 ± 2.7     | 6 ± 1.6        | 0.041                              | ns                                    | ns              | ns              | *               |
| 31    | 34.2 ± 3.6                                                | 24.8 ± 8.1   | 16.8 ± 14.1   | 6.5 ± 2        | 0.013                              | ns                                    | ns              | ns              | *               |
| 32    | 53.9 ± 21.7                                               | 59.2 ± 24.2  | 22.5 ± 15.4   | 13.6 ± 4.4     | 0.034                              | ns                                    | ns              | ns              | *               |
| 33    | 10.1 ± 1.7                                                | 7.2 ± 1.8    | 3.7 ± 1.1     | 3.7 ± 1.8      | 0.014                              | ns                                    | ns              | **              | ns              |
| 34    | 2.4 ± 1                                                   | 2.6 ± 0.5    | 1.2 ± 0.2     | 1.1 ± 0.4      | 0.026                              | ns                                    | ns              | ns              | *               |
| 35    | 1.1 ± 0.3                                                 | 0.5 ± 0.1    | 0.3 ± 0.01    | 0.4 ± 0.3      | 0.015                              | *                                     | ns              | *               | ns              |
| 36    | 29 ± 3.8                                                  | 34.6 ± 3.3   | 15.8 ± 1.5    | 15.1 ± 0.9     | <0.0001                            | ns                                    | ns              | **              | ****            |
| 37    | 12.5 ± 3.3                                                | 16.8 ± 2.8   | 41.5 ± 16.5   | 7.8 ± 3.8      | 0.011                              | ns                                    | *               | *               | ns              |
| 38    | 3.2 ± 1.7                                                 | 0.5 ± 0.1    | 1.5 ± 1.5     | 0.8 ± 0.1      | 0.018                              | *                                     | ns              | ns              | ns              |
| 39    | 2 ± 0.6                                                   | 0.3 ± 0.2    | 0.6 ± 0.2     | 0.3 ± 0.2      | 0.022                              | **                                    | ns              | **              | ns              |
| 40    | 6 ± 2.8                                                   | 5.2 ± 1      | 3.5 ± 1.1     | 2 ± 0.4        | 0.026                              | ns                                    | ns              | ns              | **              |
| 41    | 50.1 ± 12.2                                               | 46 ± 6.9     | 32.1 ± 7.6    | 18.5 ± 12.3    | 0.026                              | ns                                    | ns              | ns              | *               |
| 42    | 38 ± 10.5                                                 | 44 ± 11      | 31.4 ± 6      | 20.5 ± 2.2     | 0.012                              | ns                                    | ns              | ns              | *               |
| 43    | 8.5 ± 3                                                   | 6 ± 1.6      | 3.3 ± 2       | 2 ± 1.4        | 0.034                              | ns                                    | ns              | ns              | *               |

<sup>a</sup> The mean of normalized spot volume and the respective SD were calculated by GraphPad Prism 6.0 software using the normalized volume data calculated by Progenesis SameSpots 4.0 software. All data were reported in order of magnitude 10<sup>-6</sup>.

<sup>b</sup> ANOVA test was performed by Progenesis SameSpots 4.0 software to determine if the relative change was statistically significant (*p*<0.05).

<sup>c</sup> Tukey's post-hoc test was performed on ANOVA *p*-values by GraphPad Prism 6.0 software (\**p*<0.05), (\*\**p*<0.01), (\*\*\*)*p*<0.001), (\*\*\*\**p*<0.0001), (ns= not significant).

<sup>d</sup> Fold change was calculated by GraphPad Prism 6.0 software. It is the ratio of the mean normalized spot volumes of male basket group (BM), male control group (CM), female basket group (BF) and female control group (CF). It was reported only for statistically significant values.

**Supplementary Table S2.** List of Metabolites identified in saliva samples of the subject utilized in this study by Gas Chromatography–mass spectrometry (GC-MS) analysis.

| Compound name                   | Retention time | Fiehn library number | CAS number* | KEGG ID° |
|---------------------------------|----------------|----------------------|-------------|----------|
| 1 monostearin                   | 24.912         | 24699                | 123-94-4    |          |
| 1,3-propanediol                 | 6.777          | 10442                | 504-63-2    | C02457   |
| 1,5-anhydro-D-sorbitol          | 16.967         | 219984               | 154-58-5    | C07326   |
| 5-aminovaleric acid             | 14.458         | 138                  | 660-88-8    | C00431   |
| D (+)altrose                    | 17.460         | 441032               | 1990-29-0   | C06464   |
| D-allose                        | 17.278         | 448388               | 579-36-2    | C01487   |
| D-mannitol                      | 17.810         | 6251                 | 87-78-5     | C00392   |
| D-sphingosine                   | 22.527         | 5280335              | 123-78-4    | C00319   |
| L-(+) lactic acid               | 6.851          | 107689               | 79-33-4     | C00186   |
| L-glutamic acid                 | 13.232         | 33032                | 56-86-0     | C00025   |
| L-glutamine                     | 14.083         | 738                  | 56-85-9     | C00064   |
| L-lysine                        | 17.643         | 5962                 | 56-87-1     | C00047   |
| L-norleucine                    | 10.607         | 21236                | 327-57-1    | C01933   |
| L-ornithine                     | 16.632         | 6262                 | 70-26-8     | C00077   |
| L-proline                       | 10.321         | 145742               | 147-85-3    | C00148   |
| L-serine                        | 11.174         | 5951                 | 56-45-1     | C00065   |
| L-threonine                     | 11.464         | 6288                 | 72-19-5     | C00188   |
| L-valine                        | 9.151          | 6287                 | 72-18-4     | C00183   |
| N-acetyl-D-mannosamine          | 19.339         | 899                  | 7772-94-3   | C00645   |
| O-phosphocolamine               | 16.232         | 1015                 | 1071-23-4   | C00346   |
| Acetohydroxamic acid            | 7.720          | 1990                 | 546-88-3    | C06808   |
| Beta-gentiobiose                | 25.420         | 441422               | 5996-00-9   | C08240   |
| Citramalic acid                 | 12.630         | 439766               | 2306-22-1   | C00815   |
| Citric acid                     | 16.615         | 311                  | 5949-29-1   | C00158   |
| Eicosapentaenoic acid           | 24.013         | 446284               | 10417-94-4  | C06428   |
| Ethanolamine                    | 9.879          | 700                  | 141-43-5    | C00189   |
| Galactinol                      | 26.479         | 439451               | 3687-64-7   | C01235   |
| Glycerol 1-phosphate            | 16.056         | 754                  | 34363-28-5  | C03189   |
| Glycine                         | 10.456         | 750                  | 56-40-6     | C00037   |
| Hydrocinnamic acid              | 11.900         | 107                  | 501-52-0    | C05629   |
| Malonic acid                    | 8.919          | 867                  | 141-82-2    | C00383   |
| Maltitol                        | 25.370         | 16217663             | 585-88-6    | C05399   |
| Methyl-beta-D-galactopyranoside | 16.935         | 94214                | 1824-94-8   | C03619   |
| N-acetylneuraminic acid         | 23.855         | 445063               | 131-48-6    | C00270   |
| Oxalic acid                     | 7.883          | 971                  | 144-62-7    | C00209   |
| Palmitic acid                   | 18.846         | 985                  | 64519-82-0  | C00249   |
| Phosphoric acid                 | 9.966          | 1004                 | 7664-38-2   | C00009   |
| Pipecolic acid                  | 11.220         | 439227               | 7664-38-2   | C00009   |
| Psicose                         | 17.059         | 90008                | 551-68-8    | C06468   |
| Rhamnose                        | 15.574         | 220001               | 3615-41-6   | C00507   |
| Ribitol                         | 15.660         | 827                  | 488-81-3    | C00474   |
| Succinic acid                   | 10.509         | 1110                 | 29915-38-6  | C00042   |

|           |        |      |          |        |
|-----------|--------|------|----------|--------|
| Taurine   | 14.940 | 1123 | 107-35-7 | C00245 |
| Tyrosine  | 17.871 | 6057 | 60-18-4  | C00082 |
| Urea      | 9.599  | 1176 | 57-13-6  | C00086 |
| Uric acid | 19.331 | 1175 | 66-22-8  | C00366 |
| Xylitol   | 15.376 | 6912 | 87-99-0  | C00379 |
| Xylose    | 14.700 | 6027 | 58-86-6  | C00181 |

\* Chemical Abstract Service number; ° KEGG identifier (<https://www.genome.jp/kegg/>).
